# Supplementary material for: Mutualism Breakdown by Amplification of Wolbachia Genes
Source: PLoS Biol. 2015 Feb 10;13(2):e1002065. doi: 10.1371/journal.pbio.1002065 (PMC4323108; doi:10.1371/journal.pbio.1002065)
Supplement: S7 Data — (XLS) [file pbio.1002065.s007.xls]

## Sheet: Fig. 3E
Replicate (vial number)	Time (day)	Status (1-dead; 0-alive)	Wolbachia_status	Mother_genetic_background	Wolbachia_variant	Octomom_copy_number	Sex
1	10	1	Wol-	iso	-	-	Female
1	10	1	Wol-	iso	-	-	Female
1	11	1	Wol-	iso	-	-	Female
1	11	1	Wol-	iso	-	-	Female
1	11	1	Wol-	iso	-	-	Female
1	11	1	Wol-	iso	-	-	Female
1	11	1	Wol-	iso	-	-	Female
1	11	1	Wol-	iso	-	-	Female
1	11	1	Wol-	iso	-	-	Female
1	12	1	Wol-	iso	-	-	Female
2	5	1	Wol-	iso	-	-	Female
2	10	1	Wol-	iso	-	-	Female
2	10	1	Wol-	iso	-	-	Female
2	10	1	Wol-	iso	-	-	Female
2	10	1	Wol-	iso	-	-	Female
2	10	1	Wol-	iso	-	-	Female
2	11	1	Wol-	iso	-	-	Female
2	11	1	Wol-	iso	-	-	Female
2	11	1	Wol-	iso	-	-	Female
2	12	1	Wol-	iso	-	-	Female
3	10	1	Wol-	iso	-	-	Female
3	10	1	Wol-	iso	-	-	Female
3	10	1	Wol-	iso	-	-	Female
3	10	1	Wol-	iso	-	-	Female
3	10	1	Wol-	iso	-	-	Female
3	10	1	Wol-	iso	-	-	Female
3	10	1	Wol-	iso	-	-	Female
3	10	1	Wol-	iso	-	-	Female
3	10	1	Wol-	iso	-	-	Female
3	10	1	Wol-	iso	-	-	Female
4	8	1	Wol-	iso	-	-	Female
4	10	1	Wol-	iso	-	-	Female
4	10	1	Wol-	iso	-	-	Female
4	10	1	Wol-	iso	-	-	Female
4	10	1	Wol-	iso	-	-	Female
4	10	1	Wol-	iso	-	-	Female
4	10	1	Wol-	iso	-	-	Female
4	10	1	Wol-	iso	-	-	Female
4	11	1	Wol-	iso	-	-	Female
4	11	1	Wol-	iso	-	-	Female
5	10	1	Wol-	iso	-	-	Female
5	10	1	Wol-	iso	-	-	Female
5	10	1	Wol-	iso	-	-	Female
5	11	1	Wol-	iso	-	-	Female
5	11	1	Wol-	iso	-	-	Female
5	11	1	Wol-	iso	-	-	Female
5	11	1	Wol-	iso	-	-	Female
5	11	1	Wol-	iso	-	-	Female
5	11	1	Wol-	iso	-	-	Female
5	11	1	Wol-	iso	-	-	Female
1	10	1	Wol+	iso	wMelCS_b	1	Female
1	10	1	Wol+	iso	wMelCS_b	1	Female
1	13	1	Wol+	iso	wMelCS_b	1	Female
1	14	1	Wol+	iso	wMelCS_b	1	Female
1	14	1	Wol+	iso	wMelCS_b	1	Female
1	16	1	Wol+	iso	wMelCS_b	1	Female
1	19	1	Wol+	iso	wMelCS_b	1	Female
1	34	1	Wol+	iso	wMelCS_b	1	Female
1	34	1	Wol+	iso	wMelCS_b	1	Female
1	51	0	Wol+	iso	wMelCS_b	1	Female
2	12	1	Wol+	iso	wMelCS_b	1	Female
2	12	1	Wol+	iso	wMelCS_b	1	Female
2	16	1	Wol+	iso	wMelCS_b	1	Female
2	17	1	Wol+	iso	wMelCS_b	1	Female
2	18	1	Wol+	iso	wMelCS_b	1	Female
2	18	1	Wol+	iso	wMelCS_b	1	Female
2	19	1	Wol+	iso	wMelCS_b	1	Female
2	20	1	Wol+	iso	wMelCS_b	1	Female
2	20	1	Wol+	iso	wMelCS_b	1	Female
2	28	1	Wol+	iso	wMelCS_b	1	Female
3	12	1	Wol+	iso	wMelCS_b	1	Female
3	13	1	Wol+	iso	wMelCS_b	1	Female
3	16	1	Wol+	iso	wMelCS_b	1	Female
3	18	1	Wol+	iso	wMelCS_b	1	Female
3	20	1	Wol+	iso	wMelCS_b	1	Female
3	22	1	Wol+	iso	wMelCS_b	1	Female
3	24	1	Wol+	iso	wMelCS_b	1	Female
3	27	1	Wol+	iso	wMelCS_b	1	Female
3	30	1	Wol+	iso	wMelCS_b	1	Female
3	38	1	Wol+	iso	wMelCS_b	1	Female
4	11	1	Wol+	iso	wMelCS_b	1	Female
4	11	1	Wol+	iso	wMelCS_b	1	Female
4	13	1	Wol+	iso	wMelCS_b	1	Female
4	13	1	Wol+	iso	wMelCS_b	1	Female
4	14	1	Wol+	iso	wMelCS_b	1	Female
4	17	1	Wol+	iso	wMelCS_b	1	Female
4	17	1	Wol+	iso	wMelCS_b	1	Female
4	18	1	Wol+	iso	wMelCS_b	1	Female
4	43	1	Wol+	iso	wMelCS_b	1	Female
4	51	1	Wol+	iso	wMelCS_b	1	Female
5	13	1	Wol+	iso	wMelCS_b	1	Female
5	14	1	Wol+	iso	wMelCS_b	1	Female
5	14	1	Wol+	iso	wMelCS_b	1	Female
5	17	1	Wol+	iso	wMelCS_b	1	Female
5	17	1	Wol+	iso	wMelCS_b	1	Female
5	18	1	Wol+	iso	wMelCS_b	1	Female
5	19	1	Wol+	iso	wMelCS_b	1	Female
5	20	1	Wol+	iso	wMelCS_b	1	Female
5	30	1	Wol+	iso	wMelCS_b	1	Female
5	40	1	Wol+	iso	wMelCS_b	1	Female
1	11	1	Wol+	w1118	wMelPop	1	Female
1	12	1	Wol+	w1118	wMelPop	1	Female
1	15	1	Wol+	w1118	wMelPop	1	Female
1	16	1	Wol+	w1118	wMelPop	1	Female
1	17	1	Wol+	w1118	wMelPop	1	Female
1	19	1	Wol+	w1118	wMelPop	1	Female
1	19	1	Wol+	w1118	wMelPop	1	Female
1	20	1	Wol+	w1118	wMelPop	1	Female
1	23	1	Wol+	w1118	wMelPop	1	Female
1	29	1	Wol+	w1118	wMelPop	1	Female
2	13	1	Wol+	w1118	wMelPop	1	Female
2	14	1	Wol+	w1118	wMelPop	1	Female
2	14	1	Wol+	w1118	wMelPop	1	Female
2	14	1	Wol+	w1118	wMelPop	1	Female
2	15	1	Wol+	w1118	wMelPop	1	Female
2	15	1	Wol+	w1118	wMelPop	1	Female
2	16	1	Wol+	w1118	wMelPop	1	Female
2	17	1	Wol+	w1118	wMelPop	1	Female
2	19	1	Wol+	w1118	wMelPop	1	Female
2	33	1	Wol+	w1118	wMelPop	1	Female
3	12	1	Wol+	w1118	wMelPop	1	Female
3	12	1	Wol+	w1118	wMelPop	1	Female
3	14	1	Wol+	w1118	wMelPop	1	Female
3	14	1	Wol+	w1118	wMelPop	1	Female
3	14	1	Wol+	w1118	wMelPop	1	Female
3	15	1	Wol+	w1118	wMelPop	1	Female
3	16	1	Wol+	w1118	wMelPop	1	Female
3	23	1	Wol+	w1118	wMelPop	1	Female
3	39	1	Wol+	w1118	wMelPop	1	Female
3	51	0	Wol+	w1118	wMelPop	1	Female
4	10	1	Wol+	w1118	wMelPop	1	Female
4	13	1	Wol+	w1118	wMelPop	1	Female
4	13	1	Wol+	w1118	wMelPop	1	Female
4	14	1	Wol+	w1118	wMelPop	1	Female
4	14	1	Wol+	w1118	wMelPop	1	Female
4	20	1	Wol+	w1118	wMelPop	1	Female
4	20	1	Wol+	w1118	wMelPop	1	Female
4	24	1	Wol+	w1118	wMelPop	1	Female
4	26	1	Wol+	w1118	wMelPop	1	Female
4	39	1	Wol+	w1118	wMelPop	1	Female
5	12	1	Wol+	w1118	wMelPop	1	Female
5	12	1	Wol+	w1118	wMelPop	1	Female
5	14	1	Wol+	w1118	wMelPop	1	Female
5	16	1	Wol+	w1118	wMelPop	1	Female
5	16	1	Wol+	w1118	wMelPop	1	Female
5	18	1	Wol+	w1118	wMelPop	1	Female
5	18	1	Wol+	w1118	wMelPop	1	Female
5	20	1	Wol+	w1118	wMelPop	1	Female
5	21	1	Wol+	w1118	wMelPop	1	Female
5	23	1	Wol+	w1118	wMelPop	1	Female
1	11	1	Wol+	w1118	wMelPop	2	Female
1	18	1	Wol+	w1118	wMelPop	2	Female
1	18	1	Wol+	w1118	wMelPop	2	Female
1	18	1	Wol+	w1118	wMelPop	2	Female
1	19	1	Wol+	w1118	wMelPop	2	Female
1	24	1	Wol+	w1118	wMelPop	2	Female
1	28	1	Wol+	w1118	wMelPop	2	Female
1	33	1	Wol+	w1118	wMelPop	2	Female
1	38	1	Wol+	w1118	wMelPop	2	Female
1	39	1	Wol+	w1118	wMelPop	2	Female
2	3	1	Wol+	w1118	wMelPop	2	Female
2	10	1	Wol+	w1118	wMelPop	2	Female
2	16	1	Wol+	w1118	wMelPop	2	Female
2	19	1	Wol+	w1118	wMelPop	2	Female
2	20	1	Wol+	w1118	wMelPop	2	Female
2	21	1	Wol+	w1118	wMelPop	2	Female
2	30	1	Wol+	w1118	wMelPop	2	Female
2	35	1	Wol+	w1118	wMelPop	2	Female
2	43	1	Wol+	w1118	wMelPop	2	Female
2	51	0	Wol+	w1118	wMelPop	2	Female
3	17	1	Wol+	w1118	wMelPop	2	Female
3	17	1	Wol+	w1118	wMelPop	2	Female
3	18	1	Wol+	w1118	wMelPop	2	Female
3	20	1	Wol+	w1118	wMelPop	2	Female
3	20	1	Wol+	w1118	wMelPop	2	Female
3	35	1	Wol+	w1118	wMelPop	2	Female
3	39	1	Wol+	w1118	wMelPop	2	Female
3	40	1	Wol+	w1118	wMelPop	2	Female
3	42	1	Wol+	w1118	wMelPop	2	Female
3	46	1	Wol+	w1118	wMelPop	2	Female
4	16	1	Wol+	w1118	wMelPop	2	Female
4	17	1	Wol+	w1118	wMelPop	2	Female
4	18	1	Wol+	w1118	wMelPop	2	Female
4	19	1	Wol+	w1118	wMelPop	2	Female
4	20	1	Wol+	w1118	wMelPop	2	Female
4	23	1	Wol+	w1118	wMelPop	2	Female
4	25	1	Wol+	w1118	wMelPop	2	Female
4	34	1	Wol+	w1118	wMelPop	2	Female
4	45	1	Wol+	w1118	wMelPop	2	Female
4	51	0	Wol+	w1118	wMelPop	2	Female
5	13	1	Wol+	w1118	wMelPop	2	Female
5	14	1	Wol+	w1118	wMelPop	2	Female
5	19	1	Wol+	w1118	wMelPop	2	Female
5	19	1	Wol+	w1118	wMelPop	2	Female
5	25	1	Wol+	w1118	wMelPop	2	Female
5	30	1	Wol+	w1118	wMelPop	2	Female
5	44	1	Wol+	w1118	wMelPop	2	Female
5	45	1	Wol+	w1118	wMelPop	2	Female
5	46	1	Wol+	w1118	wMelPop	2	Female
5	46	1	Wol+	w1118	wMelPop	2	Female
1	4	1	Wol+	w1118	wMelPop	11	Female
1	12	1	Wol+	w1118	wMelPop	11	Female
1	17	1	Wol+	w1118	wMelPop	11	Female
1	22	1	Wol+	w1118	wMelPop	11	Female
1	34	1	Wol+	w1118	wMelPop	11	Female
1	35	1	Wol+	w1118	wMelPop	11	Female
1	51	0	Wol+	w1118	wMelPop	11	Female
1	51	0	Wol+	w1118	wMelPop	11	Female
1	51	0	Wol+	w1118	wMelPop	11	Female
1	51	0	Wol+	w1118	wMelPop	11	Female
2	11	1	Wol+	w1118	wMelPop	11	Female
2	12	1	Wol+	w1118	wMelPop	11	Female
2	15	1	Wol+	w1118	wMelPop	11	Female
2	16	1	Wol+	w1118	wMelPop	11	Female
2	16	1	Wol+	w1118	wMelPop	11	Female
2	17	1	Wol+	w1118	wMelPop	11	Female
2	36	1	Wol+	w1118	wMelPop	11	Female
2	38	1	Wol+	w1118	wMelPop	11	Female
2	46	1	Wol+	w1118	wMelPop	11	Female
2	51	0	Wol+	w1118	wMelPop	11	Female
3	12	1	Wol+	w1118	wMelPop	11	Female
3	18	1	Wol+	w1118	wMelPop	11	Female
3	25	1	Wol+	w1118	wMelPop	11	Female
3	36	1	Wol+	w1118	wMelPop	11	Female
3	40	1	Wol+	w1118	wMelPop	11	Female
3	51	0	Wol+	w1118	wMelPop	11	Female
3	51	0	Wol+	w1118	wMelPop	11	Female
3	51	0	Wol+	w1118	wMelPop	11	Female
3	51	0	Wol+	w1118	wMelPop	11	Female
3	51	0	Wol+	w1118	wMelPop	11	Female
4	26	1	Wol+	w1118	wMelPop	11	Female
4	29	1	Wol+	w1118	wMelPop	11	Female
4	35	1	Wol+	w1118	wMelPop	11	Female
4	44	1	Wol+	w1118	wMelPop	11	Female
4	51	0	Wol+	w1118	wMelPop	11	Female
4	51	0	Wol+	w1118	wMelPop	11	Female
4	51	0	Wol+	w1118	wMelPop	11	Female
4	51	0	Wol+	w1118	wMelPop	11	Female
4	51	0	Wol+	w1118	wMelPop	11	Female
4	51	0	Wol+	w1118	wMelPop	11	Female
5	14	1	Wol+	w1118	wMelPop	11	Female
5	14	1	Wol+	w1118	wMelPop	11	Female
5	27	1	Wol+	w1118	wMelPop	11	Female
5	32	1	Wol+	w1118	wMelPop	11	Female
5	39	1	Wol+	w1118	wMelPop	11	Female
5	51	0	Wol+	w1118	wMelPop	11	Female
5	51	0	Wol+	w1118	wMelPop	11	Female
5	51	0	Wol+	w1118	wMelPop	11	Female
5	51	0	Wol+	w1118	wMelPop	11	Female
5	51	0	Wol+	w1118	wMelPop	11	Female
1	8	1	Wol+	iso	wMelPop	12	Female
1	35	1	Wol+	iso	wMelPop	12	Female
1	41	1	Wol+	iso	wMelPop	12	Female
1	51	0	Wol+	iso	wMelPop	12	Female
1	51	0	Wol+	iso	wMelPop	12	Female
1	51	0	Wol+	iso	wMelPop	12	Female
1	51	0	Wol+	iso	wMelPop	12	Female
1	51	0	Wol+	iso	wMelPop	12	Female
1	51	0	Wol+	iso	wMelPop	12	Female
1	51	0	Wol+	iso	wMelPop	12	Female
2	14	1	Wol+	iso	wMelPop	12	Female
2	18	1	Wol+	iso	wMelPop	12	Female
2	31	1	Wol+	iso	wMelPop	12	Female
2	35	1	Wol+	iso	wMelPop	12	Female
2	46	1	Wol+	iso	wMelPop	12	Female
2	51	0	Wol+	iso	wMelPop	12	Female
2	51	0	Wol+	iso	wMelPop	12	Female
2	51	0	Wol+	iso	wMelPop	12	Female
2	51	0	Wol+	iso	wMelPop	12	Female
2	51	0	Wol+	iso	wMelPop	12	Female
3	17	1	Wol+	iso	wMelPop	12	Female
3	45	1	Wol+	iso	wMelPop	12	Female
3	46	1	Wol+	iso	wMelPop	12	Female
3	48	1	Wol+	iso	wMelPop	12	Female
3	51	0	Wol+	iso	wMelPop	12	Female
3	51	0	Wol+	iso	wMelPop	12	Female
3	51	0	Wol+	iso	wMelPop	12	Female
3	51	0	Wol+	iso	wMelPop	12	Female
3	51	0	Wol+	iso	wMelPop	12	Female
3	51	0	Wol+	iso	wMelPop	12	Female
4	16	1	Wol+	iso	wMelPop	12	Female
4	25	1	Wol+	iso	wMelPop	12	Female
4	28	1	Wol+	iso	wMelPop	12	Female
4	51	0	Wol+	iso	wMelPop	12	Female
4	51	0	Wol+	iso	wMelPop	12	Female
4	51	0	Wol+	iso	wMelPop	12	Female
4	51	0	Wol+	iso	wMelPop	12	Female
4	51	0	Wol+	iso	wMelPop	12	Female
4	51	0	Wol+	iso	wMelPop	12	Female
4	51	0	Wol+	iso	wMelPop	12	Female
5	17	1	Wol+	iso	wMelPop	12	Female
5	23	1	Wol+	iso	wMelPop	12	Female
5	25	1	Wol+	iso	wMelPop	12	Female
5	29	1	Wol+	iso	wMelPop	12	Female
5	31	1	Wol+	iso	wMelPop	12	Female
5	49	1	Wol+	iso	wMelPop	12	Female
5	51	0	Wol+	iso	wMelPop	12	Female
5	51	0	Wol+	iso	wMelPop	12	Female
5	51	0	Wol+	iso	wMelPop	12	Female
5	51	0	Wol+	iso	wMelPop	12	Female
