# Supplementary material for: Mutualism Breakdown by Amplification of Wolbachia Genes
Source: PLoS Biol. 2015 Feb 10;13(2):e1002065. doi: 10.1371/journal.pbio.1002065 (PMC4323108; doi:10.1371/journal.pbio.1002065)
Supplement: S14 Data — (XLS) [file pbio.1002065.s014.xls]

## Sheet: Fig. S5D
Replicate (vial number)	Time (day)	Status (1-dead; 0-alive)	Wolbachia_status	Wolbachia_variant	Octomom_copy_number	Sex
1	52	1	Wol+	wMelPop	2	Female
1	52	1	Wol+	wMelPop	2	Female
1	56	1	Wol+	wMelPop	2	Female
1	60	1	Wol+	wMelPop	2	Female
1	63	1	Wol+	wMelPop	2	Female
1	63	1	Wol+	wMelPop	2	Female
1	64	1	Wol+	wMelPop	2	Female
1	65	1	Wol+	wMelPop	2	Female
1	68	1	Wol+	wMelPop	2	Female
1	70	1	Wol+	wMelPop	2	Female
2	48	1	Wol+	wMelPop	2	Female
2	48	1	Wol+	wMelPop	2	Female
2	51	1	Wol+	wMelPop	2	Female
2	52	1	Wol+	wMelPop	2	Female
2	55	1	Wol+	wMelPop	2	Female
2	55	1	Wol+	wMelPop	2	Female
2	55	1	Wol+	wMelPop	2	Female
2	60	1	Wol+	wMelPop	2	Female
2	62	1	Wol+	wMelPop	2	Female
3	9	1	Wol+	wMelPop	2	Female
3	29	1	Wol+	wMelPop	2	Female
3	49	1	Wol+	wMelPop	2	Female
3	51	1	Wol+	wMelPop	2	Female
3	52	1	Wol+	wMelPop	2	Female
3	52	1	Wol+	wMelPop	2	Female
3	52	1	Wol+	wMelPop	2	Female
3	52	1	Wol+	wMelPop	2	Female
3	57	1	Wol+	wMelPop	2	Female
3	60	1	Wol+	wMelPop	2	Female
4	41	1	Wol+	wMelPop	2	Female
4	52	1	Wol+	wMelPop	2	Female
4	54	1	Wol+	wMelPop	2	Female
4	54	1	Wol+	wMelPop	2	Female
4	57	1	Wol+	wMelPop	2	Female
4	59	1	Wol+	wMelPop	2	Female
4	60	1	Wol+	wMelPop	2	Female
4	60	1	Wol+	wMelPop	2	Female
4	60	1	Wol+	wMelPop	2	Female
4	63	1	Wol+	wMelPop	2	Female
5	8	1	Wol+	wMelPop	2	Female
5	15	1	Wol+	wMelPop	2	Female
5	49	1	Wol+	wMelPop	2	Female
5	51	1	Wol+	wMelPop	2	Female
5	52	1	Wol+	wMelPop	2	Female
5	55	1	Wol+	wMelPop	2	Female
5	55	1	Wol+	wMelPop	2	Female
5	56	1	Wol+	wMelPop	2	Female
5	61	1	Wol+	wMelPop	2	Female
5	61	1	Wol+	wMelPop	2	Female
6	3	1	Wol+	wMelPop	2	Female
6	33	1	Wol+	wMelPop	2	Female
6	33	1	Wol+	wMelPop	2	Female
6	48	1	Wol+	wMelPop	2	Female
6	48	1	Wol+	wMelPop	2	Female
6	53	1	Wol+	wMelPop	2	Female
6	53	1	Wol+	wMelPop	2	Female
6	53	1	Wol+	wMelPop	2	Female
6	53	1	Wol+	wMelPop	2	Female
6	53	1	Wol+	wMelPop	2	Female
6	54	1	Wol+	wMelPop	2	Female
6	57	1	Wol+	wMelPop	2	Female
6	58	1	Wol+	wMelPop	2	Female
6	62	1	Wol+	wMelPop	2	Female
7	49	1	Wol+	wMelPop	2	Female
7	54	1	Wol+	wMelPop	2	Female
7	58	1	Wol+	wMelPop	2	Female
7	61	1	Wol+	wMelPop	2	Female
7	62	1	Wol+	wMelPop	2	Female
7	63	1	Wol+	wMelPop	2	Female
7	63	1	Wol+	wMelPop	2	Female
7	64	1	Wol+	wMelPop	2	Female
7	70	1	Wol+	wMelPop	2	Female
8	44	1	Wol+	wMelPop	2	Female
8	44	1	Wol+	wMelPop	2	Female
8	44	1	Wol+	wMelPop	2	Female
8	53	1	Wol+	wMelPop	2	Female
8	54	1	Wol+	wMelPop	2	Female
8	57	1	Wol+	wMelPop	2	Female
8	57	1	Wol+	wMelPop	2	Female
8	57	1	Wol+	wMelPop	2	Female
8	59	1	Wol+	wMelPop	2	Female
8	61	1	Wol+	wMelPop	2	Female
9	57	1	Wol+	wMelPop	2	Female
9	58	1	Wol+	wMelPop	2	Female
9	58	1	Wol+	wMelPop	2	Female
9	60	1	Wol+	wMelPop	2	Female
9	60	1	Wol+	wMelPop	2	Female
9	61	1	Wol+	wMelPop	2	Female
9	65	1	Wol+	wMelPop	2	Female
9	65	1	Wol+	wMelPop	2	Female
9	77	0	Wol+	wMelPop	2	Female
9	77	0	Wol+	wMelPop	2	Female
10	46	1	Wol+	wMelPop	2	Female
10	46	1	Wol+	wMelPop	2	Female
10	49	1	Wol+	wMelPop	2	Female
10	57	1	Wol+	wMelPop	2	Female
10	58	1	Wol+	wMelPop	2	Female
10	59	1	Wol+	wMelPop	2	Female
10	59	1	Wol+	wMelPop	2	Female
10	61	1	Wol+	wMelPop	2	Female
10	63	1	Wol+	wMelPop	2	Female
10	63	1	Wol+	wMelPop	2	Female
1	21	1	Wol+	wMelPop	10	Female
1	21	1	Wol+	wMelPop	10	Female
1	21	1	Wol+	wMelPop	10	Female
1	21	1	Wol+	wMelPop	10	Female
1	22	1	Wol+	wMelPop	10	Female
1	22	1	Wol+	wMelPop	10	Female
1	22	1	Wol+	wMelPop	10	Female
1	22	1	Wol+	wMelPop	10	Female
1	22	1	Wol+	wMelPop	10	Female
1	22	1	Wol+	wMelPop	10	Female
2	25	1	Wol+	wMelPop	10	Female
2	25	1	Wol+	wMelPop	10	Female
2	28	1	Wol+	wMelPop	10	Female
2	28	1	Wol+	wMelPop	10	Female
2	28	1	Wol+	wMelPop	10	Female
2	29	1	Wol+	wMelPop	10	Female
2	29	1	Wol+	wMelPop	10	Female
2	29	1	Wol+	wMelPop	10	Female
2	29	1	Wol+	wMelPop	10	Female
2	29	1	Wol+	wMelPop	10	Female
3	21	1	Wol+	wMelPop	10	Female
3	21	1	Wol+	wMelPop	10	Female
3	21	1	Wol+	wMelPop	10	Female
3	21	1	Wol+	wMelPop	10	Female
3	21	1	Wol+	wMelPop	10	Female
3	21	1	Wol+	wMelPop	10	Female
3	22	1	Wol+	wMelPop	10	Female
3	22	1	Wol+	wMelPop	10	Female
3	22	1	Wol+	wMelPop	10	Female
3	24	1	Wol+	wMelPop	10	Female
3	32	1	Wol+	wMelPop	10	Female
3	34	1	Wol+	wMelPop	10	Female
4	27	1	Wol+	wMelPop	10	Female
4	27	1	Wol+	wMelPop	10	Female
4	28	1	Wol+	wMelPop	10	Female
4	31	1	Wol+	wMelPop	10	Female
4	31	1	Wol+	wMelPop	10	Female
4	31	1	Wol+	wMelPop	10	Female
4	31	1	Wol+	wMelPop	10	Female
4	31	1	Wol+	wMelPop	10	Female
4	33	1	Wol+	wMelPop	10	Female
4	35	1	Wol+	wMelPop	10	Female
5	22	1	Wol+	wMelPop	10	Female
5	22	1	Wol+	wMelPop	10	Female
5	22	1	Wol+	wMelPop	10	Female
5	24	1	Wol+	wMelPop	10	Female
5	25	1	Wol+	wMelPop	10	Female
5	25	1	Wol+	wMelPop	10	Female
5	25	1	Wol+	wMelPop	10	Female
5	28	1	Wol+	wMelPop	10	Female
5	28	1	Wol+	wMelPop	10	Female
5	29	1	Wol+	wMelPop	10	Female
6	24	1	Wol+	wMelPop	10	Female
6	25	1	Wol+	wMelPop	10	Female
6	26	1	Wol+	wMelPop	10	Female
6	28	1	Wol+	wMelPop	10	Female
6	28	1	Wol+	wMelPop	10	Female
6	29	1	Wol+	wMelPop	10	Female
6	29	1	Wol+	wMelPop	10	Female
6	29	1	Wol+	wMelPop	10	Female
6	32	1	Wol+	wMelPop	10	Female
6	35	1	Wol+	wMelPop	10	Female
7	26	1	Wol+	wMelPop	10	Female
7	26	1	Wol+	wMelPop	10	Female
7	29	1	Wol+	wMelPop	10	Female
7	30	1	Wol+	wMelPop	10	Female
7	30	1	Wol+	wMelPop	10	Female
7	30	1	Wol+	wMelPop	10	Female
7	30	1	Wol+	wMelPop	10	Female
7	30	1	Wol+	wMelPop	10	Female
7	30	1	Wol+	wMelPop	10	Female
7	35	1	Wol+	wMelPop	10	Female
8	25	1	Wol+	wMelPop	10	Female
8	29	1	Wol+	wMelPop	10	Female
8	30	1	Wol+	wMelPop	10	Female
8	30	1	Wol+	wMelPop	10	Female
8	33	1	Wol+	wMelPop	10	Female
8	33	1	Wol+	wMelPop	10	Female
8	33	1	Wol+	wMelPop	10	Female
8	33	1	Wol+	wMelPop	10	Female
8	35	1	Wol+	wMelPop	10	Female
8	35	1	Wol+	wMelPop	10	Female
9	26	1	Wol+	wMelPop	10	Female
9	28	1	Wol+	wMelPop	10	Female
9	30	1	Wol+	wMelPop	10	Female
9	30	1	Wol+	wMelPop	10	Female
9	33	1	Wol+	wMelPop	10	Female
9	33	1	Wol+	wMelPop	10	Female
9	33	1	Wol+	wMelPop	10	Female
9	33	1	Wol+	wMelPop	10	Female
9	33	1	Wol+	wMelPop	10	Female
9	36	1	Wol+	wMelPop	10	Female
10	23	1	Wol+	wMelPop	10	Female
10	23	1	Wol+	wMelPop	10	Female
10	24	1	Wol+	wMelPop	10	Female
10	25	1	Wol+	wMelPop	10	Female
10	25	1	Wol+	wMelPop	10	Female
10	26	1	Wol+	wMelPop	10	Female
10	29	1	Wol+	wMelPop	10	Female
10	29	1	Wol+	wMelPop	10	Female
10	30	1	Wol+	wMelPop	10	Female
10	30	1	Wol+	wMelPop	10	Female
