# Supplementary material for: Mutualism Breakdown by Amplification of Wolbachia Genes
Source: PLoS Biol. 2015 Feb 10;13(2):e1002065. doi: 10.1371/journal.pbio.1002065 (PMC4323108; doi:10.1371/journal.pbio.1002065)
Supplement: S22 Data — (XLS) [file pbio.1002065.s022.xls]

## Sheet: l3r
Replicate (vial number)	Time (day)	Status (1-dead; 0-alive)	Wolbachia_status	Wolbachia_variant	Selection_line	Direction_of_the_selection	Sex
1	21	1	Wol+	wMelPop	low copy line 3	forward	Female
1	22	1	Wol+	wMelPop	low copy line 3	forward	Female
1	22	1	Wol+	wMelPop	low copy line 3	forward	Female
1	22	1	Wol+	wMelPop	low copy line 3	forward	Female
1	22	1	Wol+	wMelPop	low copy line 3	forward	Female
1	23	1	Wol+	wMelPop	low copy line 3	forward	Female
1	23	1	Wol+	wMelPop	low copy line 3	forward	Female
1	24	1	Wol+	wMelPop	low copy line 3	forward	Female
1	24	1	Wol+	wMelPop	low copy line 3	forward	Female
1	25	1	Wol+	wMelPop	low copy line 3	forward	Female
2	23	1	Wol+	wMelPop	low copy line 3	forward	Female
2	23	1	Wol+	wMelPop	low copy line 3	forward	Female
2	23	1	Wol+	wMelPop	low copy line 3	forward	Female
2	23	1	Wol+	wMelPop	low copy line 3	forward	Female
2	23	1	Wol+	wMelPop	low copy line 3	forward	Female
2	24	1	Wol+	wMelPop	low copy line 3	forward	Female
2	24	1	Wol+	wMelPop	low copy line 3	forward	Female
2	24	1	Wol+	wMelPop	low copy line 3	forward	Female
2	27	1	Wol+	wMelPop	low copy line 3	forward	Female
2	27	1	Wol+	wMelPop	low copy line 3	forward	Female
3	21	1	Wol+	wMelPop	low copy line 3	forward	Female
3	21	1	Wol+	wMelPop	low copy line 3	forward	Female
3	23	1	Wol+	wMelPop	low copy line 3	forward	Female
3	23	1	Wol+	wMelPop	low copy line 3	forward	Female
3	23	1	Wol+	wMelPop	low copy line 3	forward	Female
3	24	1	Wol+	wMelPop	low copy line 3	forward	Female
3	24	1	Wol+	wMelPop	low copy line 3	forward	Female
3	24	1	Wol+	wMelPop	low copy line 3	forward	Female
3	27	1	Wol+	wMelPop	low copy line 3	forward	Female
3	27	1	Wol+	wMelPop	low copy line 3	forward	Female
4	19	1	Wol+	wMelPop	low copy line 3	forward	Female
4	19	1	Wol+	wMelPop	low copy line 3	forward	Female
4	19	1	Wol+	wMelPop	low copy line 3	forward	Female
4	19	1	Wol+	wMelPop	low copy line 3	forward	Female
4	19	1	Wol+	wMelPop	low copy line 3	forward	Female
4	22	1	Wol+	wMelPop	low copy line 3	forward	Female
4	23	1	Wol+	wMelPop	low copy line 3	forward	Female
4	23	1	Wol+	wMelPop	low copy line 3	forward	Female
4	23	1	Wol+	wMelPop	low copy line 3	forward	Female
4	23	1	Wol+	wMelPop	low copy line 3	forward	Female
5	17	1	Wol+	wMelPop	low copy line 3	forward	Female
5	19	1	Wol+	wMelPop	low copy line 3	forward	Female
5	19	1	Wol+	wMelPop	low copy line 3	forward	Female
5	20	1	Wol+	wMelPop	low copy line 3	forward	Female
5	20	1	Wol+	wMelPop	low copy line 3	forward	Female
5	21	1	Wol+	wMelPop	low copy line 3	forward	Female
5	21	1	Wol+	wMelPop	low copy line 3	forward	Female
5	21	1	Wol+	wMelPop	low copy line 3	forward	Female
5	22	1	Wol+	wMelPop	low copy line 3	forward	Female
5	22	1	Wol+	wMelPop	low copy line 3	forward	Female
5	23	1	Wol+	wMelPop	low copy line 3	forward	Female
5	23	1	Wol+	wMelPop	low copy line 3	forward	Female
5	23	1	Wol+	wMelPop	low copy line 3	forward	Female
5	23	1	Wol+	wMelPop	low copy line 3	forward	Female
6	2	1	Wol+	wMelPop	low copy line 3	forward	Female
6	18	1	Wol+	wMelPop	low copy line 3	forward	Female
6	18	1	Wol+	wMelPop	low copy line 3	forward	Female
6	18	1	Wol+	wMelPop	low copy line 3	forward	Female
6	19	1	Wol+	wMelPop	low copy line 3	forward	Female
6	19	1	Wol+	wMelPop	low copy line 3	forward	Female
6	20	1	Wol+	wMelPop	low copy line 3	forward	Female
6	20	1	Wol+	wMelPop	low copy line 3	forward	Female
6	25	1	Wol+	wMelPop	low copy line 3	forward	Female
6	25	1	Wol+	wMelPop	low copy line 3	forward	Female
1	16	1	Wol+	wMelPop	low copy line 3	reverse	Female
1	17	1	Wol+	wMelPop	low copy line 3	reverse	Female
1	17	1	Wol+	wMelPop	low copy line 3	reverse	Female
1	18	1	Wol+	wMelPop	low copy line 3	reverse	Female
1	18	1	Wol+	wMelPop	low copy line 3	reverse	Female
1	18	1	Wol+	wMelPop	low copy line 3	reverse	Female
1	19	1	Wol+	wMelPop	low copy line 3	reverse	Female
1	19	1	Wol+	wMelPop	low copy line 3	reverse	Female
1	19	1	Wol+	wMelPop	low copy line 3	reverse	Female
1	19	1	Wol+	wMelPop	low copy line 3	reverse	Female
2	15	1	Wol+	wMelPop	low copy line 3	reverse	Female
2	15	1	Wol+	wMelPop	low copy line 3	reverse	Female
2	15	1	Wol+	wMelPop	low copy line 3	reverse	Female
2	15	1	Wol+	wMelPop	low copy line 3	reverse	Female
2	15	1	Wol+	wMelPop	low copy line 3	reverse	Female
2	16	1	Wol+	wMelPop	low copy line 3	reverse	Female
2	18	1	Wol+	wMelPop	low copy line 3	reverse	Female
2	18	1	Wol+	wMelPop	low copy line 3	reverse	Female
2	18	1	Wol+	wMelPop	low copy line 3	reverse	Female
2	19	1	Wol+	wMelPop	low copy line 3	reverse	Female
3	16	1	Wol+	wMelPop	low copy line 3	reverse	Female
3	16	1	Wol+	wMelPop	low copy line 3	reverse	Female
3	17	1	Wol+	wMelPop	low copy line 3	reverse	Female
3	17	1	Wol+	wMelPop	low copy line 3	reverse	Female
3	17	1	Wol+	wMelPop	low copy line 3	reverse	Female
3	18	1	Wol+	wMelPop	low copy line 3	reverse	Female
3	18	1	Wol+	wMelPop	low copy line 3	reverse	Female
3	18	1	Wol+	wMelPop	low copy line 3	reverse	Female
3	21	1	Wol+	wMelPop	low copy line 3	reverse	Female
3	24	1	Wol+	wMelPop	low copy line 3	reverse	Female
4	16	1	Wol+	wMelPop	low copy line 3	reverse	Female
4	16	1	Wol+	wMelPop	low copy line 3	reverse	Female
4	16	1	Wol+	wMelPop	low copy line 3	reverse	Female
4	16	1	Wol+	wMelPop	low copy line 3	reverse	Female
4	17	1	Wol+	wMelPop	low copy line 3	reverse	Female
4	17	1	Wol+	wMelPop	low copy line 3	reverse	Female
4	17	1	Wol+	wMelPop	low copy line 3	reverse	Female
4	18	1	Wol+	wMelPop	low copy line 3	reverse	Female
4	18	1	Wol+	wMelPop	low copy line 3	reverse	Female
4	18	1	Wol+	wMelPop	low copy line 3	reverse	Female
5	15	1	Wol+	wMelPop	low copy line 3	reverse	Female
5	16	1	Wol+	wMelPop	low copy line 3	reverse	Female
5	17	1	Wol+	wMelPop	low copy line 3	reverse	Female
5	17	1	Wol+	wMelPop	low copy line 3	reverse	Female
5	17	1	Wol+	wMelPop	low copy line 3	reverse	Female
5	17	1	Wol+	wMelPop	low copy line 3	reverse	Female
5	17	1	Wol+	wMelPop	low copy line 3	reverse	Female
5	17	1	Wol+	wMelPop	low copy line 3	reverse	Female
5	17	1	Wol+	wMelPop	low copy line 3	reverse	Female
5	19	1	Wol+	wMelPop	low copy line 3	reverse	Female
6	9	1	Wol+	wMelPop	low copy line 3	reverse	Female
6	16	1	Wol+	wMelPop	low copy line 3	reverse	Female
6	17	1	Wol+	wMelPop	low copy line 3	reverse	Female
6	17	1	Wol+	wMelPop	low copy line 3	reverse	Female
6	17	1	Wol+	wMelPop	low copy line 3	reverse	Female
6	17	1	Wol+	wMelPop	low copy line 3	reverse	Female
6	17	1	Wol+	wMelPop	low copy line 3	reverse	Female
6	18	1	Wol+	wMelPop	low copy line 3	reverse	Female
6	19	1	Wol+	wMelPop	low copy line 3	reverse	Female
6	20	1	Wol+	wMelPop	low copy line 3	reverse	Female
